# Supplementary material for: Synthesis and evaluation of radiolabeled porphyrin derivatives for cancer diagnoses and their nonradioactive counterparts for photodynamic therapy
Source: Royal Society of Chemistry journal article supplement (doi:10.1039/d2md00234e), 2022-01-01
Supplement: d2md00234e1.pdf [file d2md00234e1.pdf]

### Supporting Information

Synthesis and evaluation of radiolabeled porphyrin derivatives for cancer diagnoses and their nonradioactive counterparts for photodynamic therapy

Nur Izni Binti Ramzi<sup>1</sup>, Kenji Mishiro<sup>2</sup>, Masayuki Munekane<sup>1</sup>, Takeshi Fuchigami<sup>1</sup>,

Xiaojun Hu<sup>3</sup>, Renata Jastrzab<sup>4</sup>, Yoji Kitamura<sup>5</sup>, Seigo Kinuya<sup>6</sup>, Kazuma Ogawa<sup>1,2\*</sup>

<sup>1</sup> Graduate School of Medical Sciences, Kanazawa University, Kakuma-machi, Kanazawa, Ishikawa 920-1192, Japan;

<sup>2</sup> Institute for Frontier Science Initiative, Kanazawa University, Kakuma-machi, Kanazawa, Ishikawa 920-1192, Japan;

<sup>3</sup> Center for Molecular Recognition and Biosensing, School of Life Sciences, Shanghai University, Shanghai 200444, China;

<sup>4</sup> Faculty of Chemistry, Adam Mickiewicz University in Poznan, Umultowska 89b, Poznan 61-614, Poland;

<sup>5</sup> Research Center for Experimental Modeling of Human Disease, Kanazawa University, Takara-machi 13-1, Kanazawa, Ishikawa 920-8640, Japan;

<sup>6</sup> Department of Nuclear Medicine, Kanazawa University Hospital, Kanazawa University, Takara-machi 13-1, Kanazawa, Ishikawa 920-8641, Japan

#### **\*Corresponding Author**

Kazuma Ogawa Tel.: 81-76-234-4460; Fax: 81-76-234-4460

E-mail: kogawa@p.kanazawa-u.ac.jp

## Table of Contents

|                                               |               |
|-----------------------------------------------|---------------|
| <b>1. NMR spectra .....</b>                   | <b>S3-S11</b> |
| <b>2. MS spectra.....</b>                     | <b>S12-16</b> |
| <b>3. Absorption spectra.....</b>             | <b>S17</b>    |
| <b>4. HPLC analysis.....</b>                  | <b>S18</b>    |
| <b>5. Detailed biodistribution data .....</b> | <b>S19-20</b> |
| <b>6. Photodynamic therapy (PDT)</b>          | <b>S21-23</b> |
| 6.1 Detailed PDT data.....                    | <b>S21</b>    |
| 6.2 Tumor weight.....                         | <b>S22</b>    |
| 6.3 Body weight.....                          | <b>S23</b>    |

# 1. NMR spectra

<sup>1</sup>H NMR spectrum of **1** (400 MHz, CDCl<sub>3</sub>)

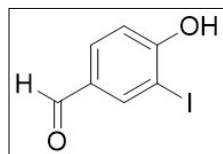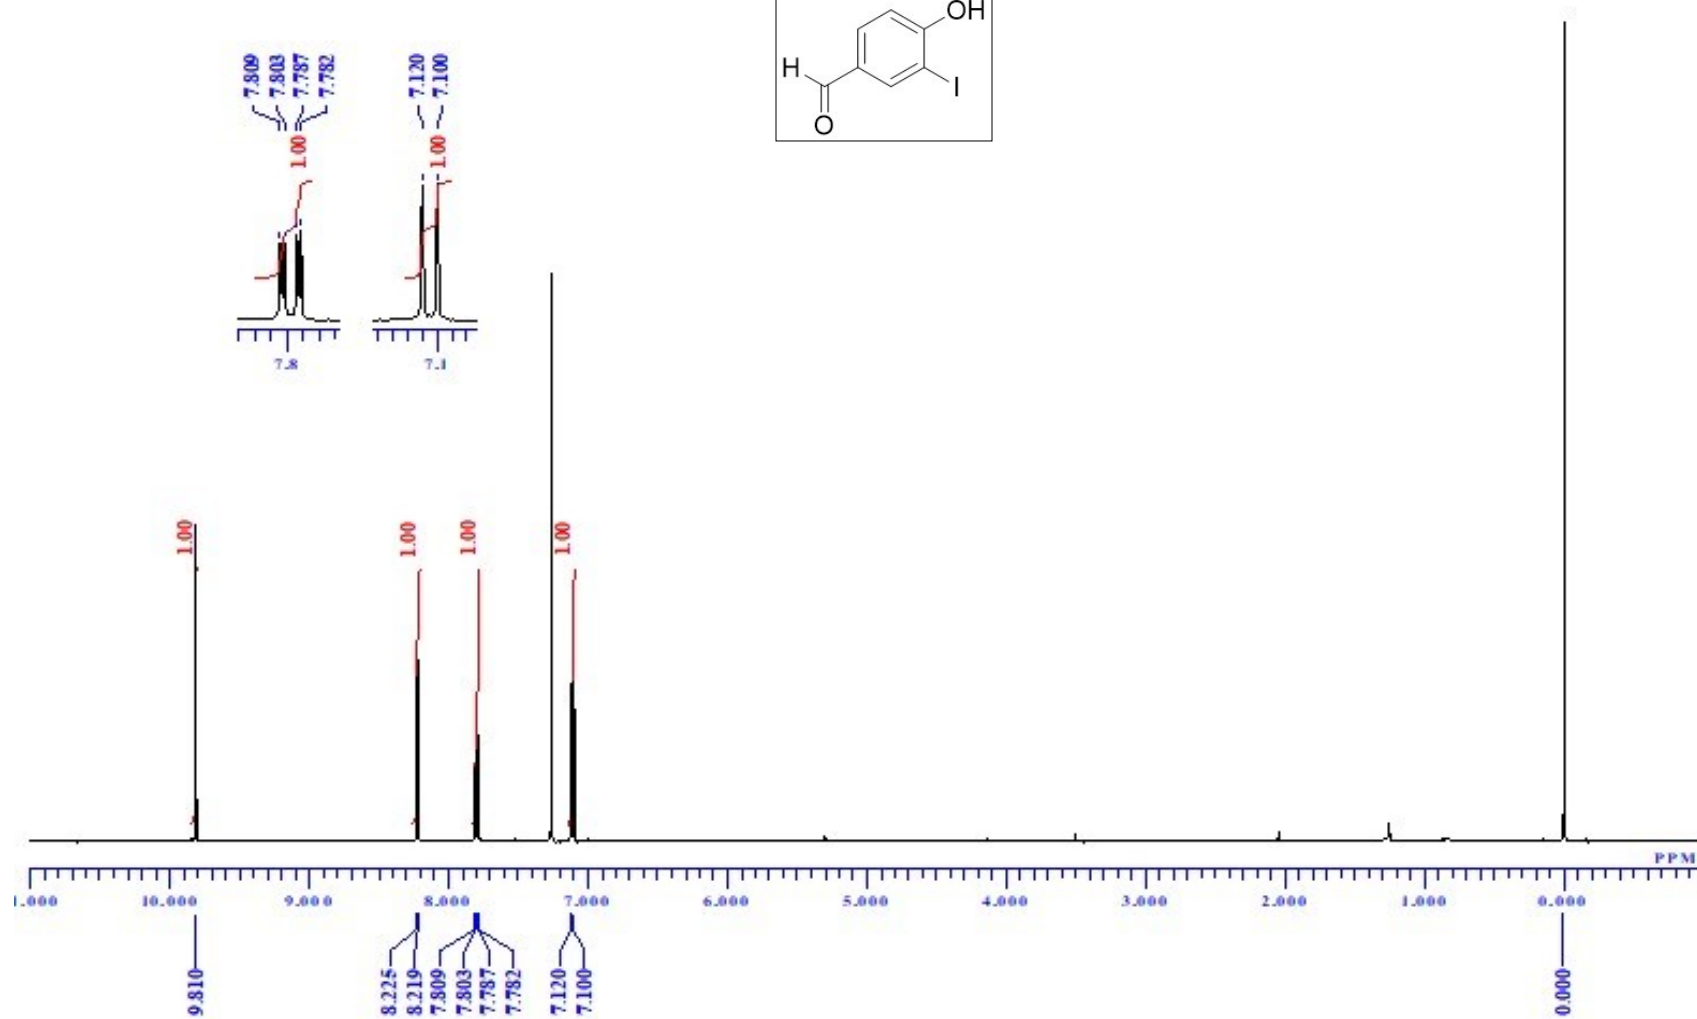

$^1\text{H}$  NMR spectrum of **2** (400 MHz,  $\text{CDCl}_3$ )

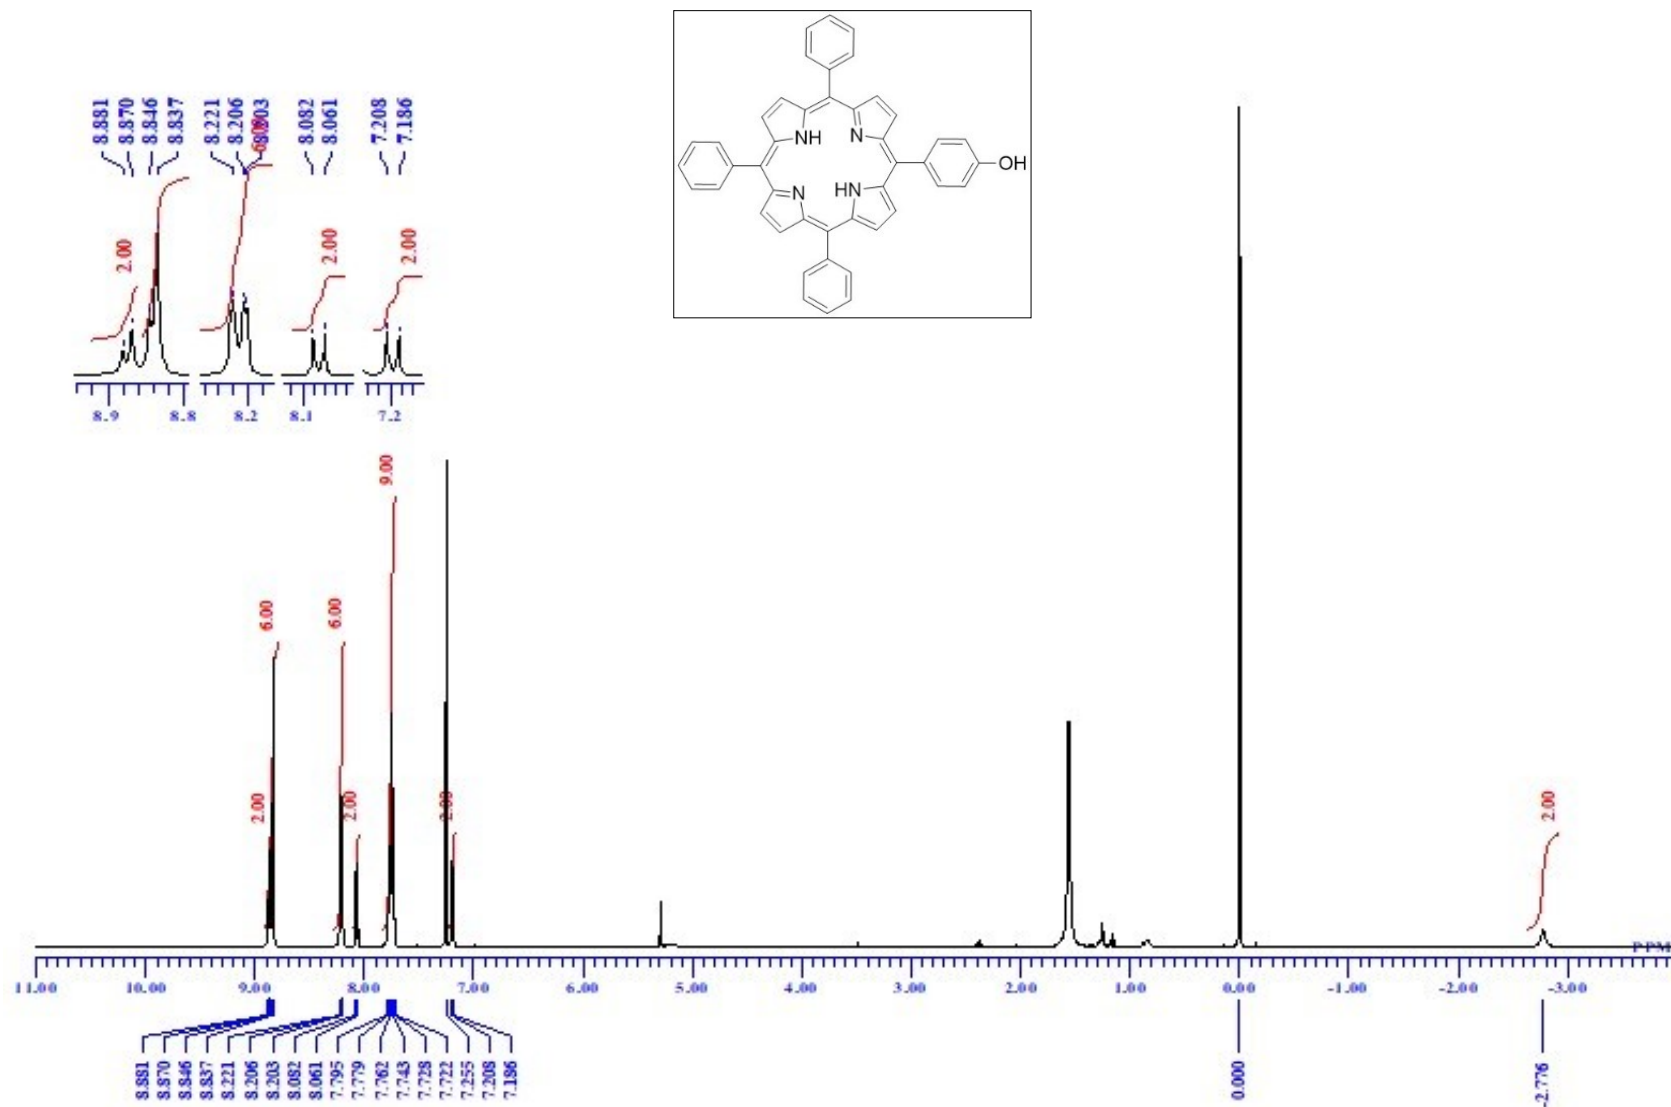

$^1\text{H}$  NMR spectrum of **3** (400 MHz,  $\text{CDCl}_3$ )

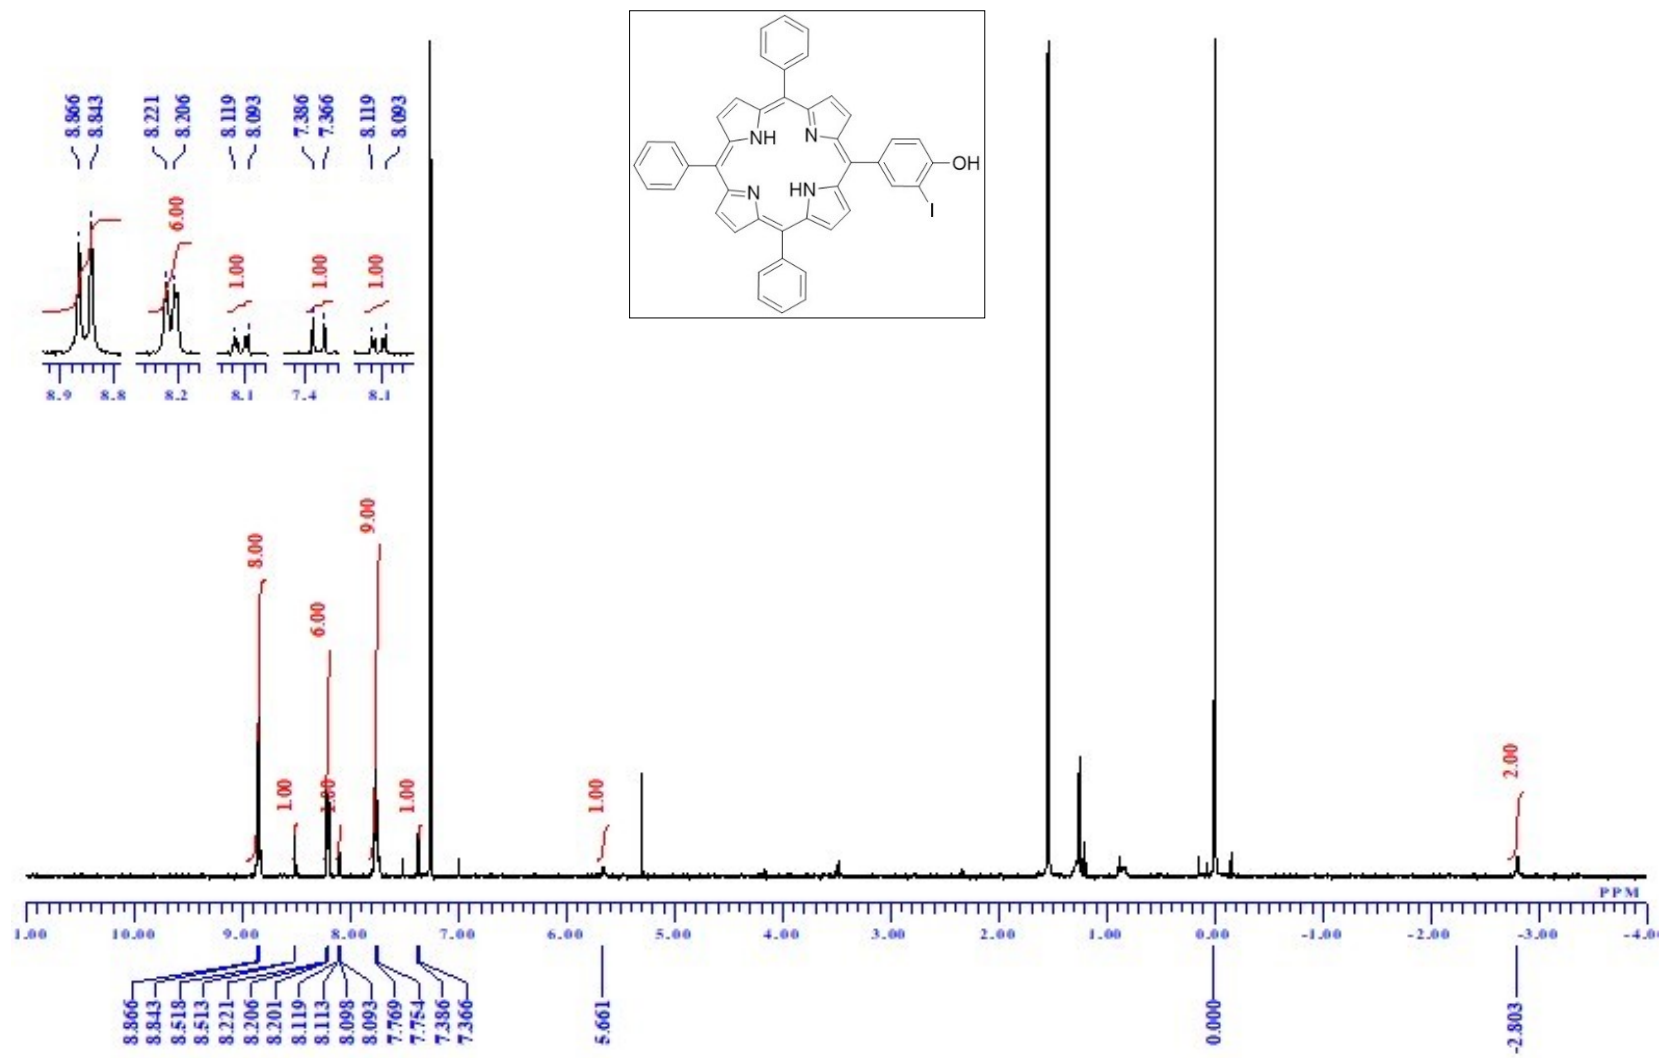

$^1\text{H}$  NMR spectrum of **4** (400 MHz,  $\text{CDCl}_3$ )

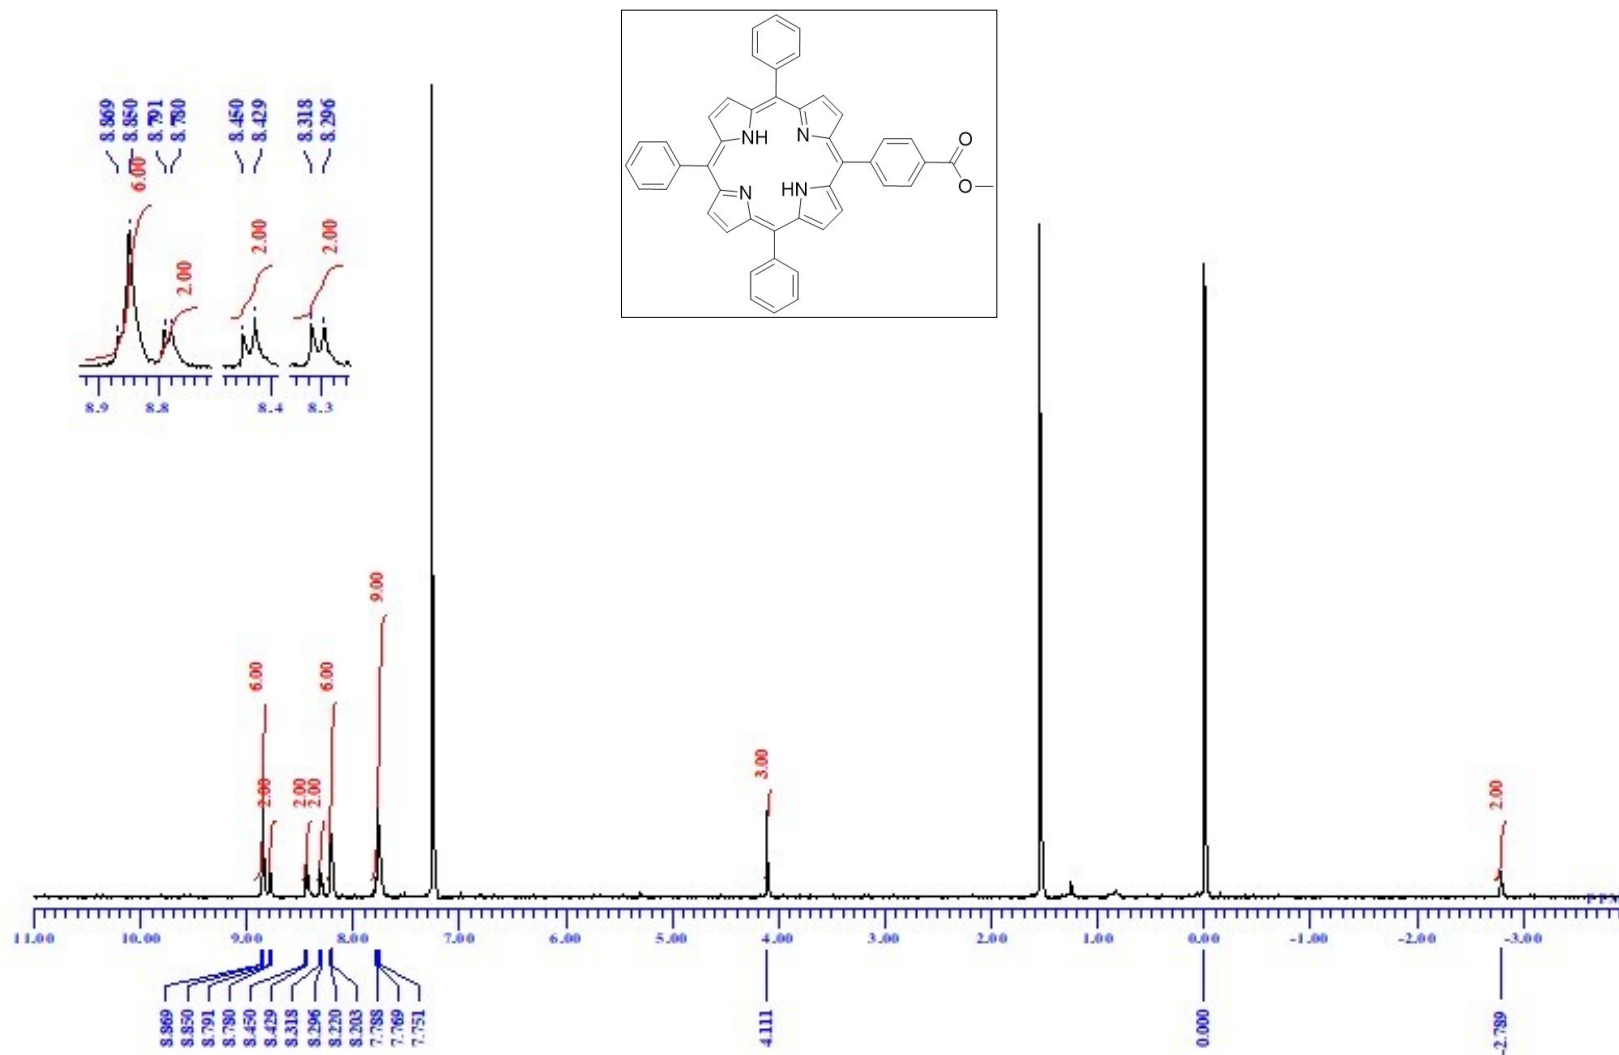

$^1\text{H}$  NMR spectrum of **5** (400 MHz,  $\text{CDCl}_3$ )

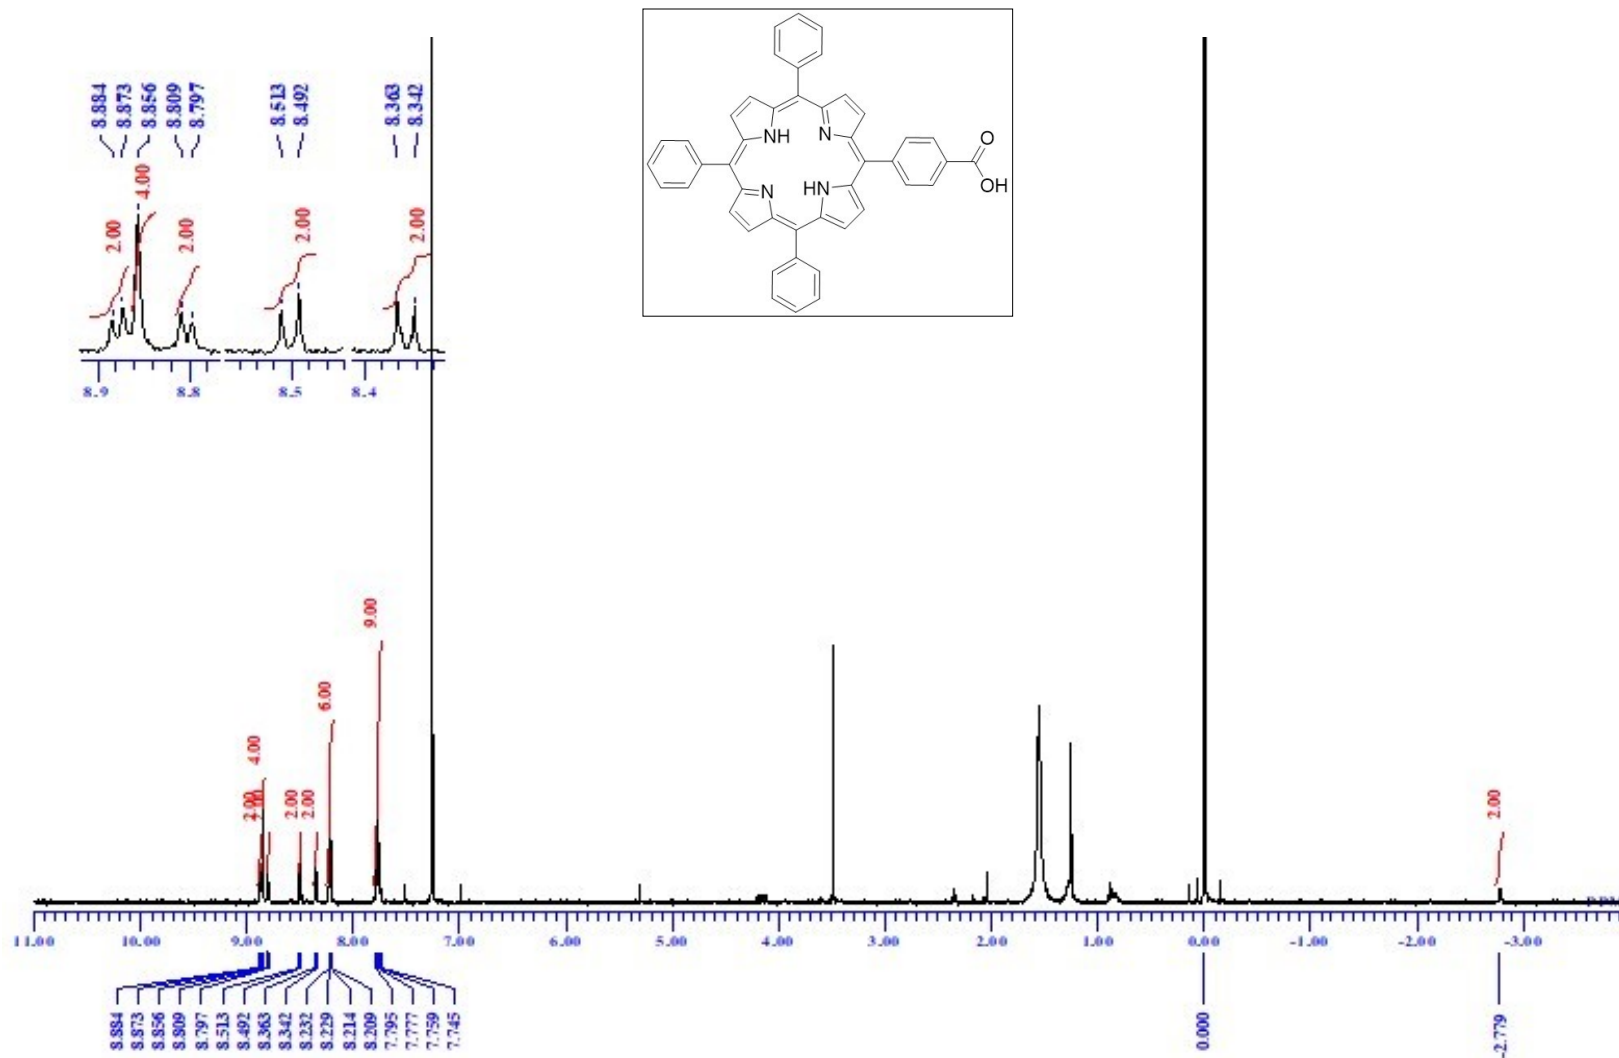

$^1\text{H}$  NMR spectrum of **6** (400 MHz,  $\text{CDCl}_3$ )

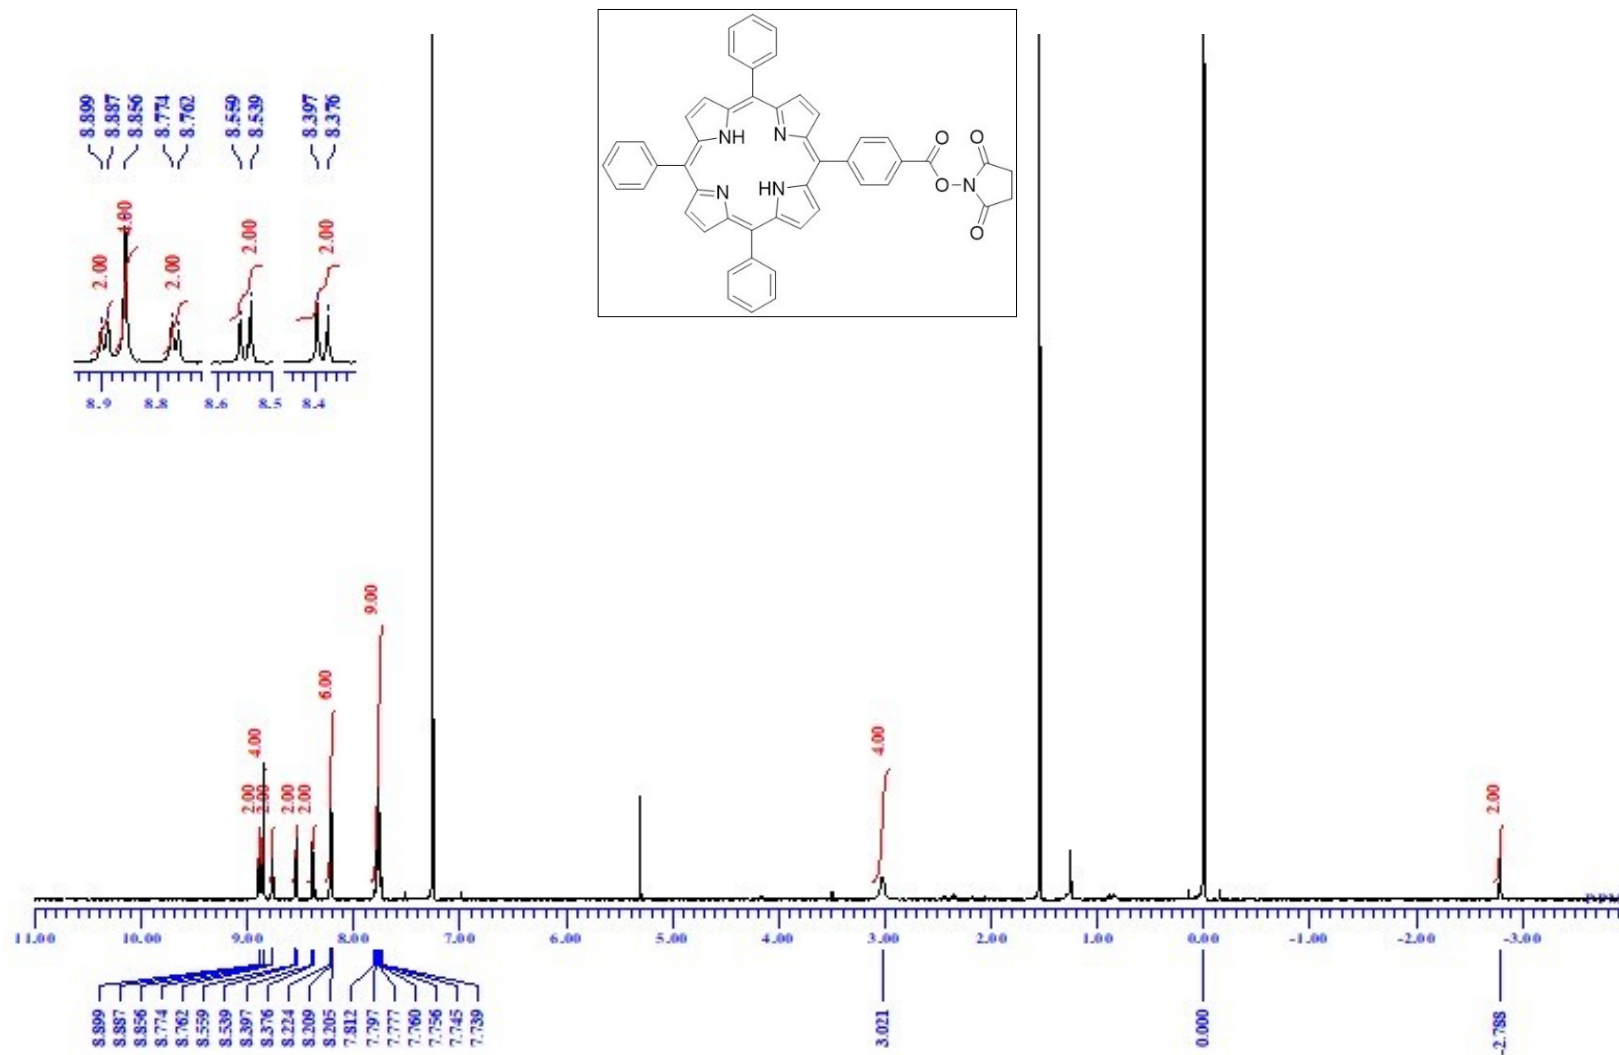



$^1\text{H}$  NMR spectrum of 7 (400 MHz, acetone- $d_6$ )

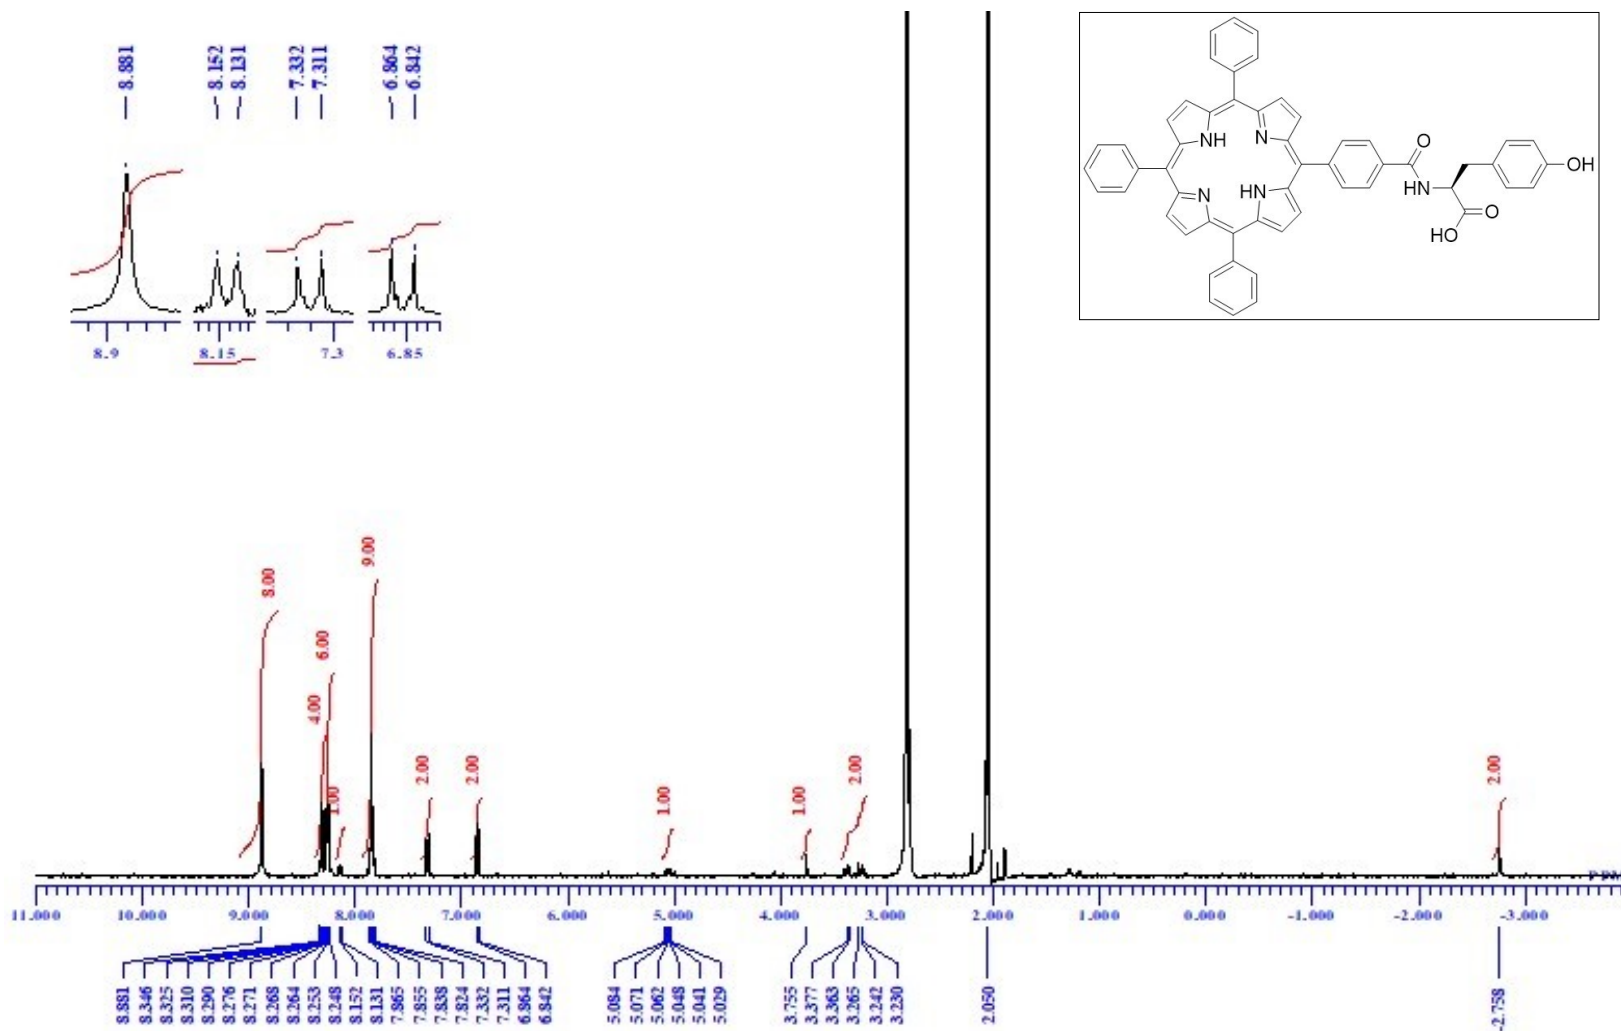

$^1\text{H}$  NMR spectrum of **8** (400 MHz,  $\text{D}_2\text{O}$ )

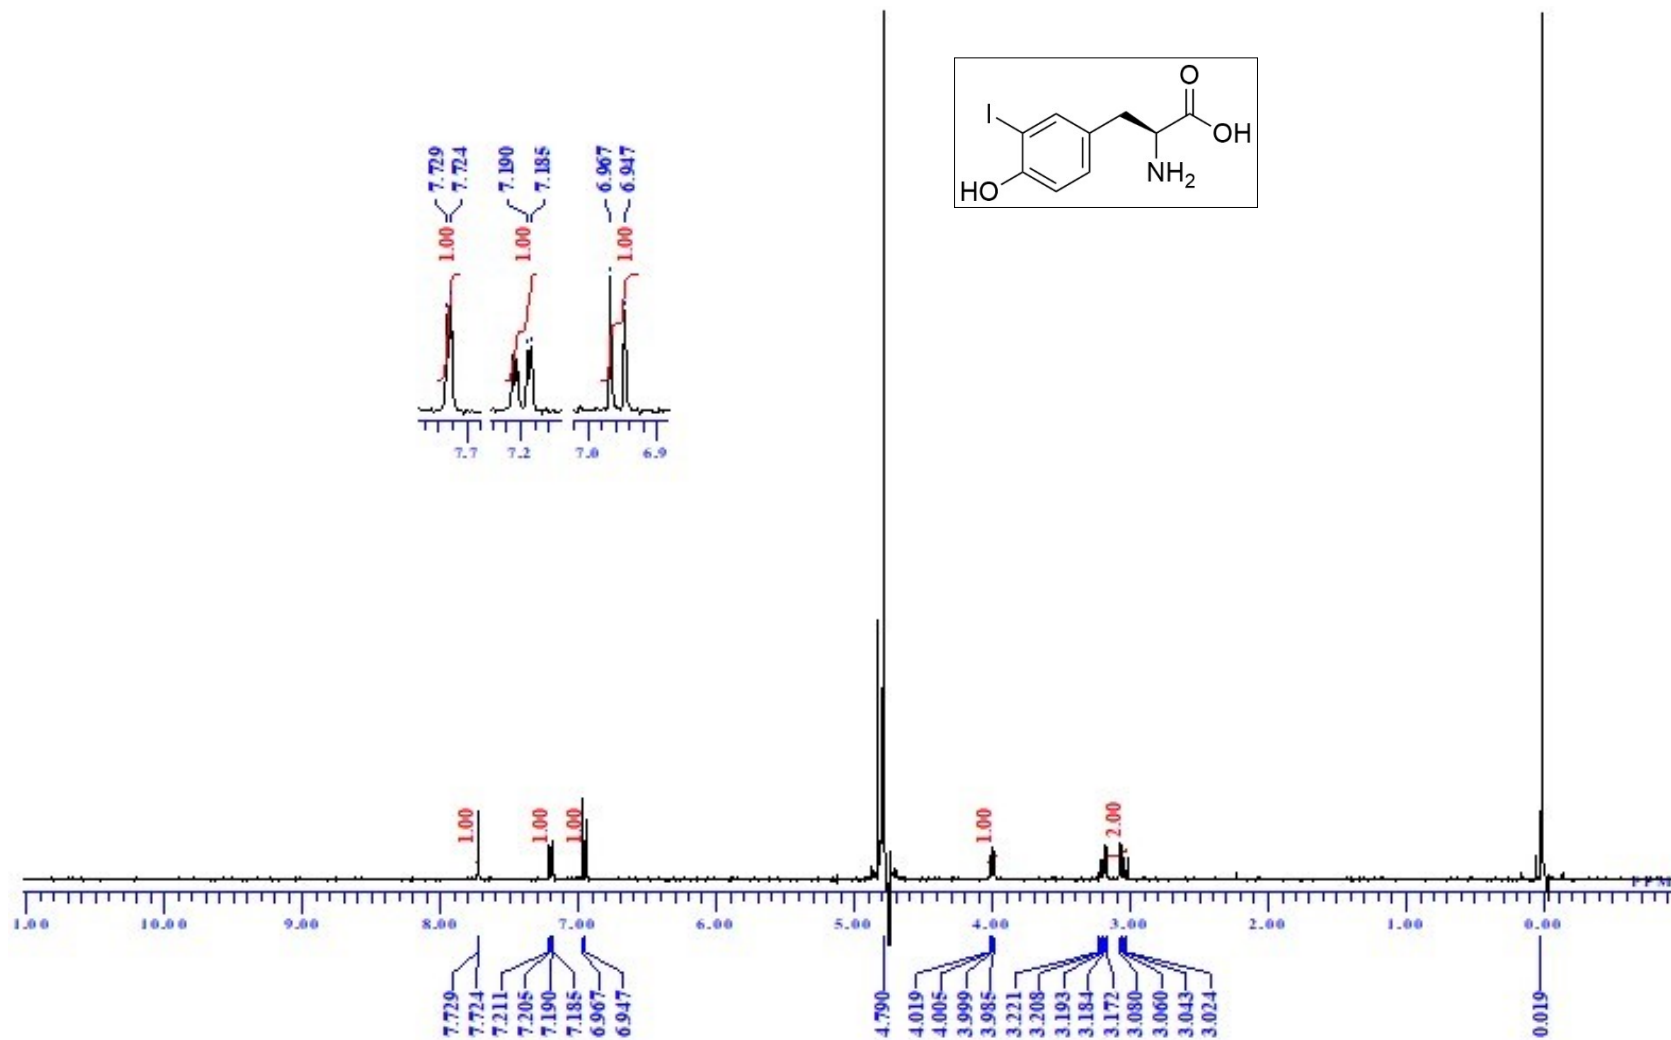

$^1\text{H}$  NMR spectrum of **9** (400 MHz, acetone- $d_6$ )

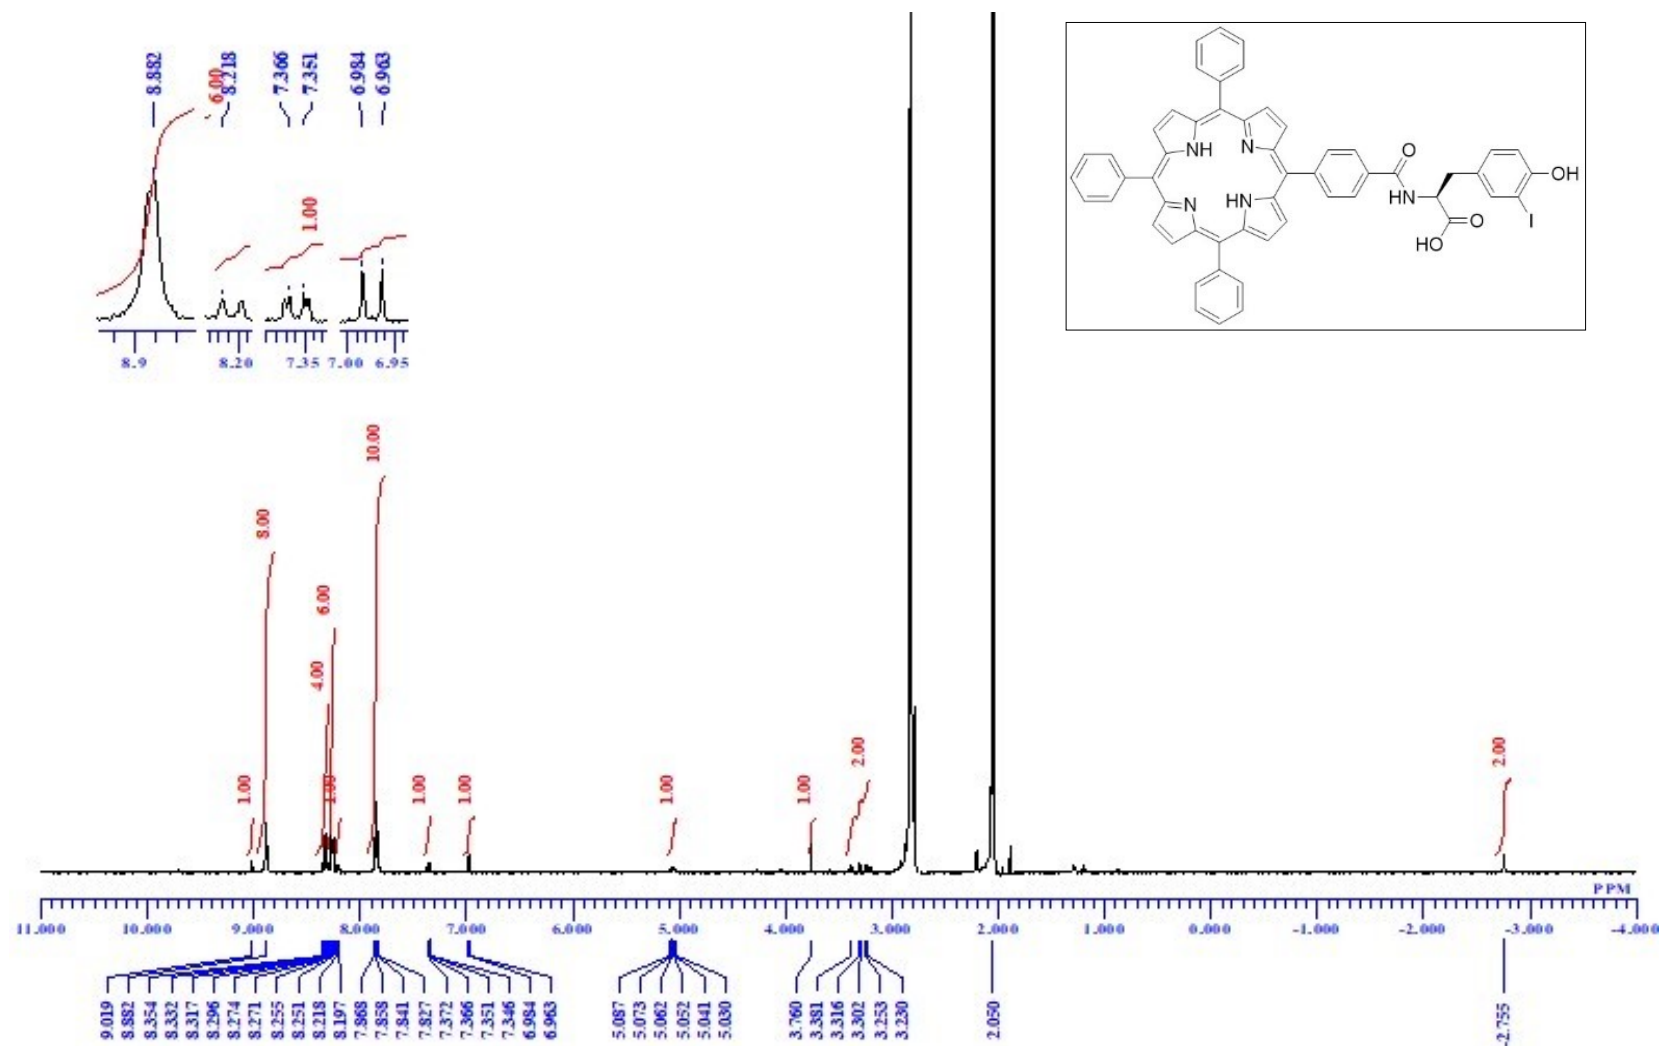

## 2. MS spectra

MS

(ESI-) spectrum of 1

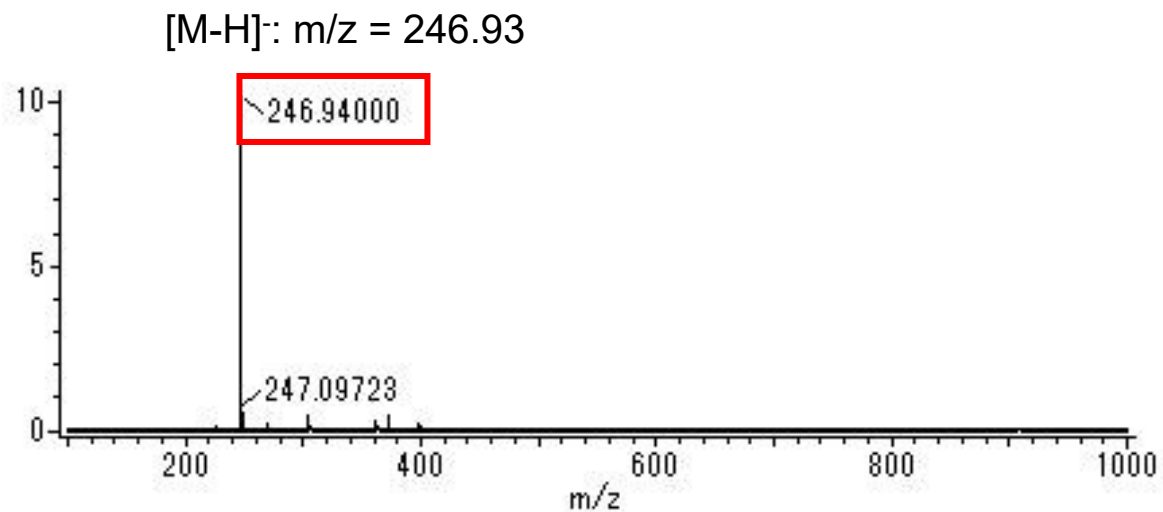

MS (ESI+) spectrum of 2

[M+H]<sup>+</sup>: m/z = 631.25

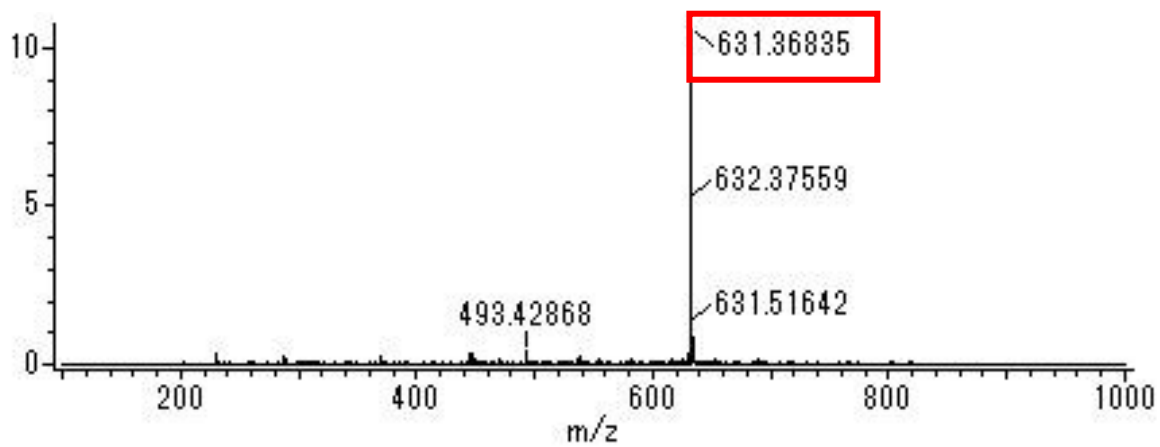

MS (ESI+) spectrum of 3

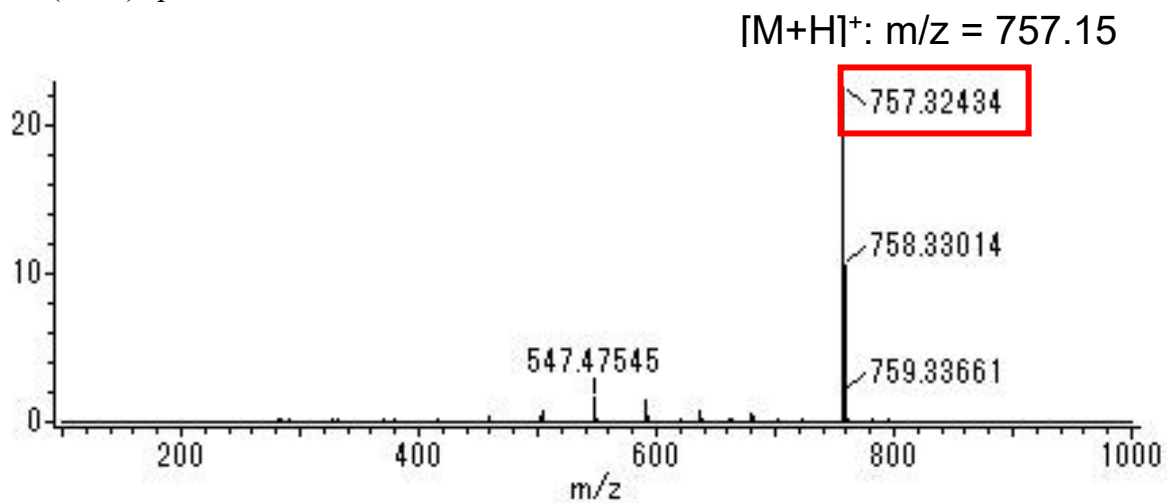

MS (ESI+) spectrum of 4

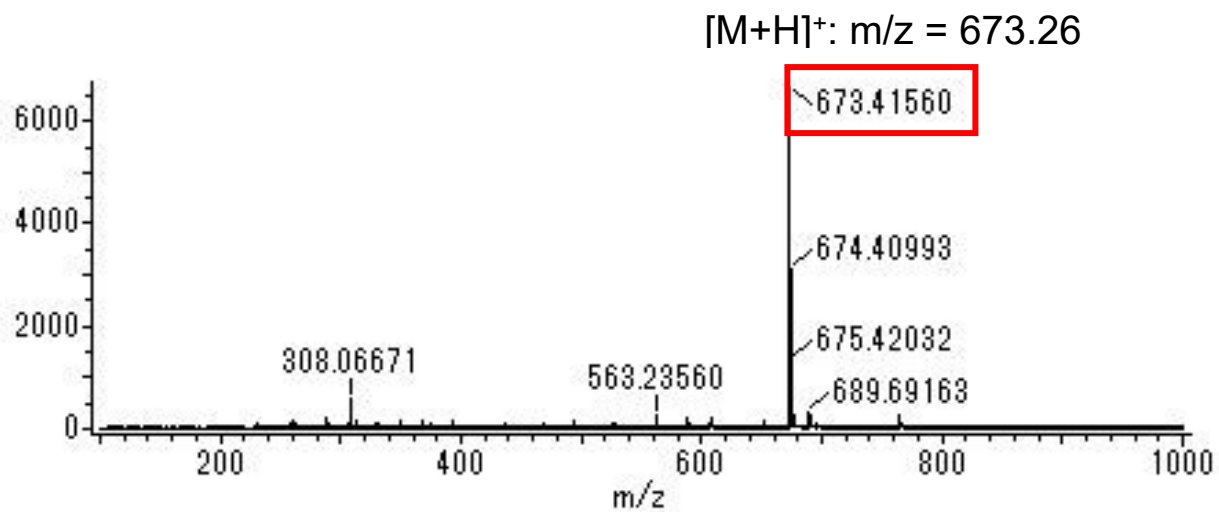

MS (ESI+) spectrum of **5**

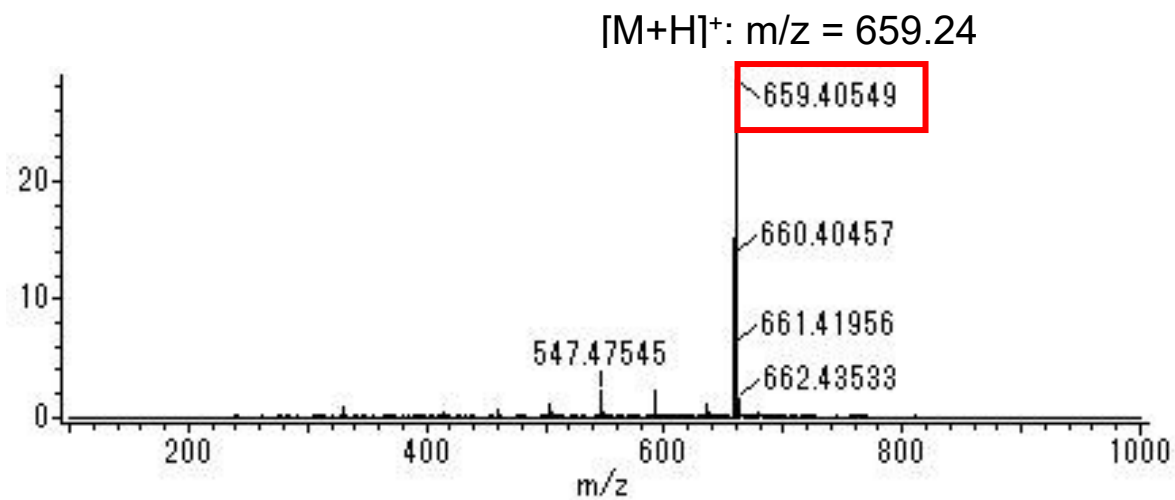

MS (ESI+) spectrum of **6**

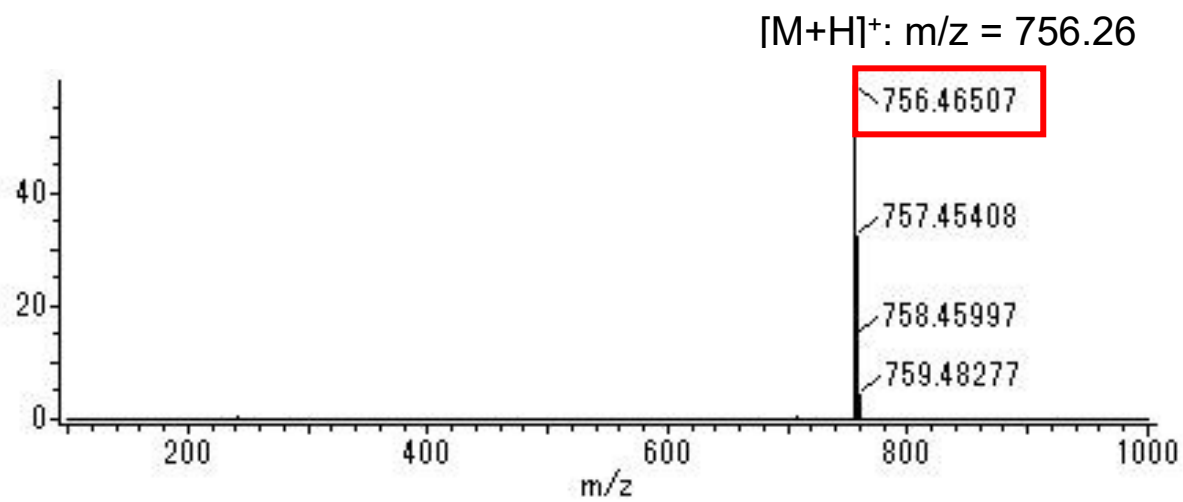

MS (ESI+) spectrum of **7**

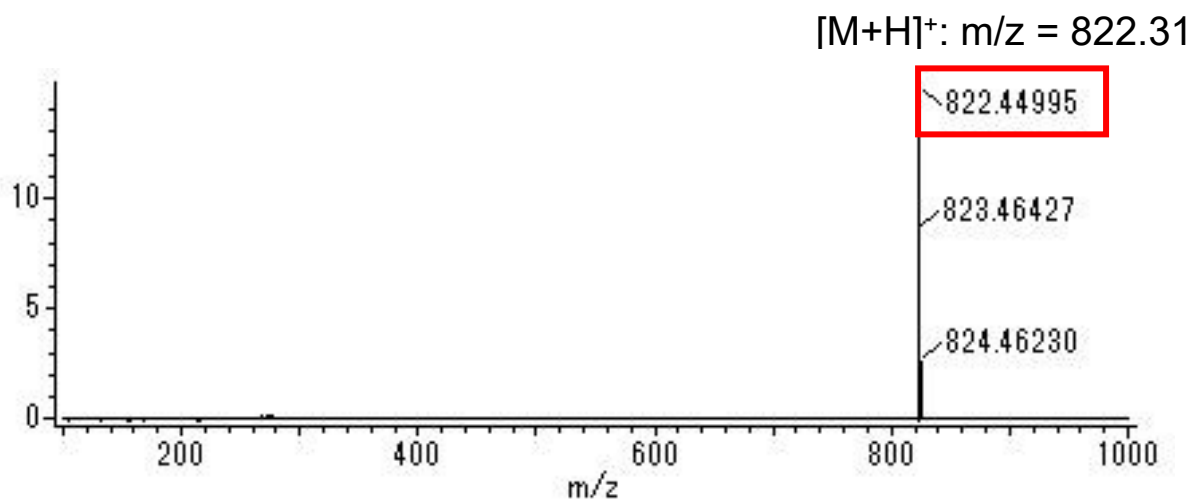

MS (ESI+)

spectrum of **8**

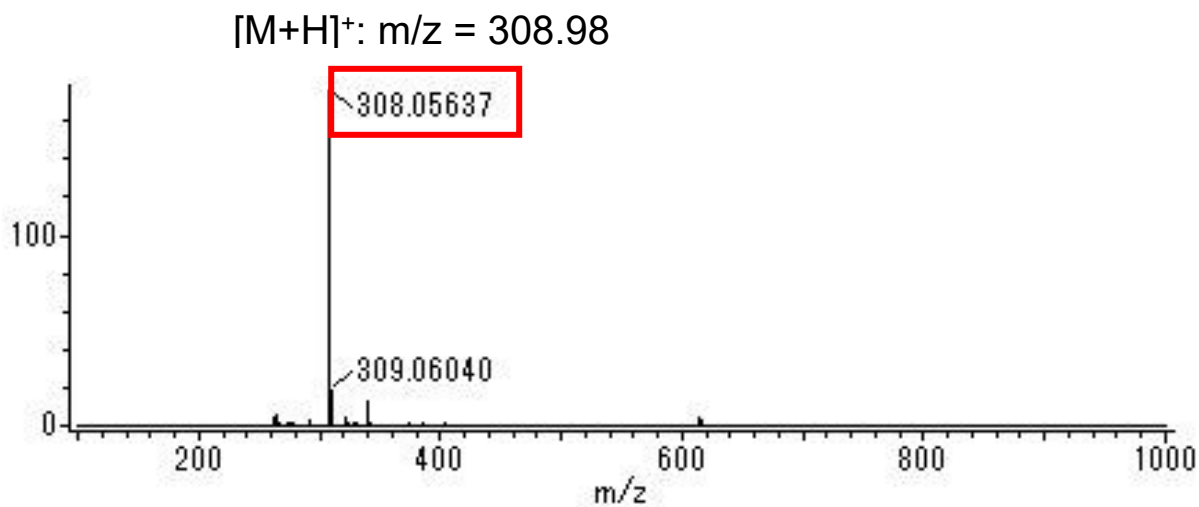

MS (ESI+) spectrum of **9**

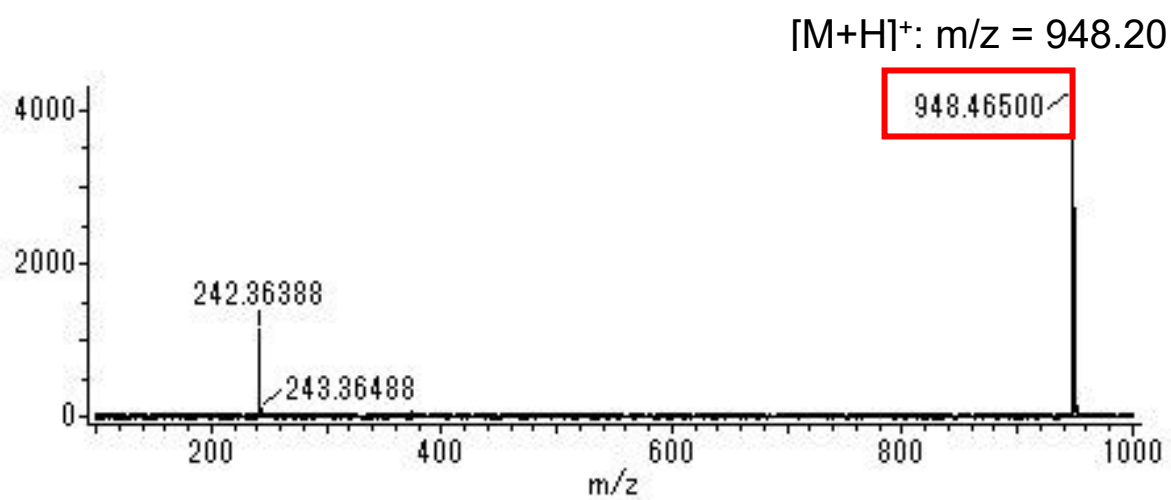



### 3. Absorption spectra

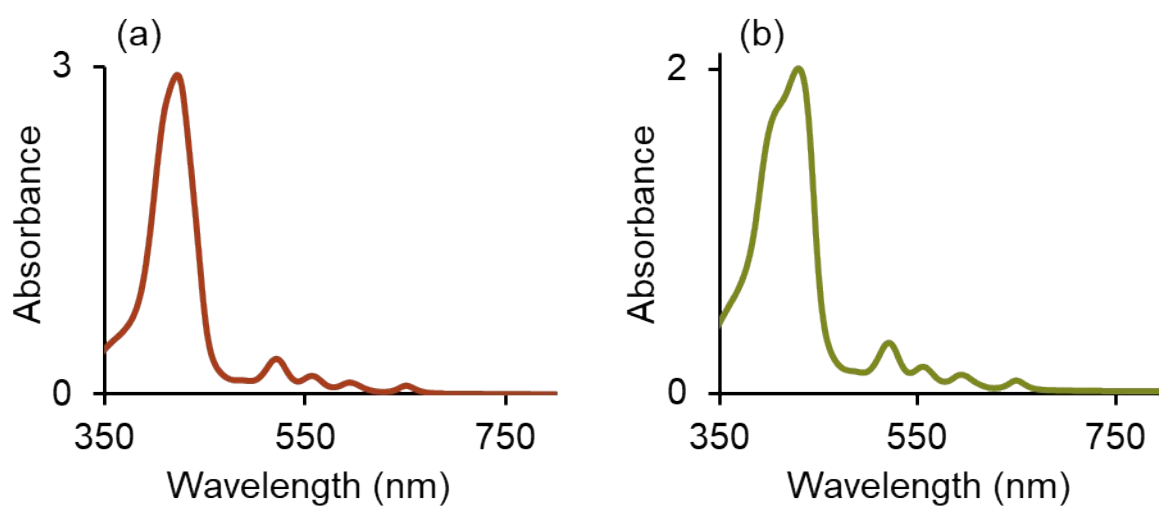

**Figure S1.** Absorption spectra of (a) I-TPP<sub>OH</sub> (**3**) and (b) I-L-tyrosine-TPP (**9**) at 25  $\mu$ M (10% DMSO in H<sub>2</sub>O).

#### 4. HPLC analysis

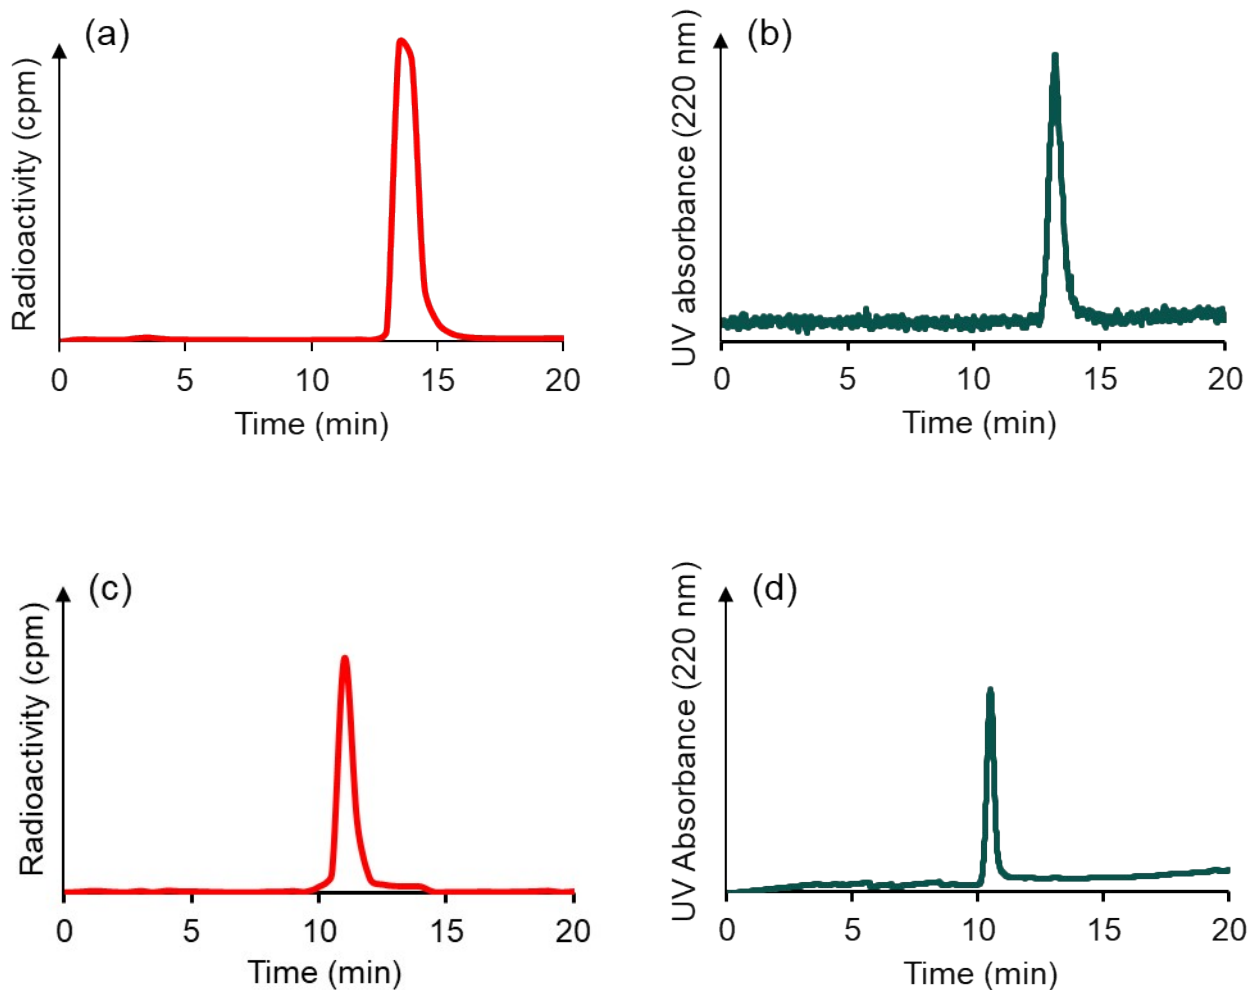

**Figure S2.** RP-HPLC chromatograms of (a) [ $^{125}\text{I}$ ]I-TPP<sub>OH</sub> ([ $^{125}\text{I}$ ]3), (b) I-TPP<sub>OH</sub> (3), (c) [ $^{125}\text{I}$ ]I-L-tyrosine-TPP ([ $^{125}\text{I}$ ]9), and (d) I-L-tyrosine-TPP (9) after purification. HPLC condition: a flow rate of 1 mL/min with a gradient mobile phase of 90 % methanol in water with 0.1% TFA to 100 % methanol in water with 0.1% TFA for 20 min.

## 5. Detailed biodistribution data

**Table S1.** Biodistribution of [<sup>125</sup>I]I-TPP<sub>OH</sub> ([<sup>125</sup>I]**3**) and [<sup>125</sup>I]I-L-tyrosine-TPP ([<sup>125</sup>I]**9**) at 1, 24, 48, and 96 h after intravenous injection in Colon 26 tumor bearing mice

| Tissues                          | Time after injection |              |               |               |
|----------------------------------|----------------------|--------------|---------------|---------------|
|                                  | 1 h                  | 24 h         | 48 h          | 96 h          |
| <b>[<sup>125</sup>I]<b>3</b></b> |                      |              |               |               |
| Blood                            | 47.40 (2.95)         | 10.52 (0.73) | 3.19 (0.28)   | 1.15 (0.27)   |
| Liver                            | 12.94 (1.83)         | 20.59 (1.15) | 19.62 (0.59)  | 17.23 (2.74)  |
| Kidney                           | 9.51 (1.42)          | 4.58 (0.38)  | 4.21 (0.50)   | 3.58 (0.42)   |
| Small intestine                  | 2.38 (0.20)          | 4.67 (0.39)  | 6.52 (0.20)   | 4.38 (0.93)   |
| Large intestine                  | 0.77 (0.09)          | 3.90 (0.46)  | 5.82 (0.84)   | 3.88 (1.30)   |
| Spleen                           | 6.03 (1.04)          | 9.94 (0.89)  | 11.82 (0.83)  | 8.28 (2.99)   |
| Pancreas                         | 1.87 (0.26)          | 1.90 (0.18)  | 2.10 (0.25)   | 1.80 (0.38)   |
| Lung                             | 24.41 (3.74)         | 8.14 (0.35)  | 6.00 (0.70)   | 3.79 (1.00)   |
| Heart                            | 7.81 (0.74)          | 4.49 (0.50)  | 4.29 (0.68)   | 3.85 (0.64)   |
| Stomach <sup>†</sup>             | 0.36 (0.04)          | 0.79 (0.07)  | 0.76 (0.08)   | 0.71 (0.10)   |
| Bone                             | 3.59 (0.60)          | 3.58 (0.48)  | 3.54 (0.13)   | 2.77 (0.38)   |
| Muscle                           | 1.00 (0.18)          | 1.22 (0.31)  | 1.40 (0.29)   | 1.42 (0.42)   |
| Brain                            | 0.88 (0.16)          | 0.27 (0.04)  | 0.16 (0.01)   | 0.12 (0.02)   |
| Colon 26                         | 4.02 (0.92)          | 13.64 (1.91) | 18.01 (2.13)  | 11.07 (2.42)  |
| Tumor/blood                      | 0.08 (0.02)          | 1.30 (0.16)  | 5.65 (0.49)   | 9.68 (1.14)   |
| Tumor/muscle                     | 4.06 (0.92)          | 11.66 (3.21) | 13.29 (2.86)  | 7.96 (1.14)   |
| <b>[<sup>125</sup>I]<b>9</b></b> |                      |              |               |               |
| Blood                            | 42.71 (2.72)**       | 9.68 (1.32)* | 3.48 (0.82)** | 1.99 (0.35)** |

|                      |               |               |                |                |
|----------------------|---------------|---------------|----------------|----------------|
| Liver                | 11.36 (0.96)* | 18.74 (2.76)  | 15.06 (1.94)** | 11.53 (1.66)** |
| Kidney               | 8.26 (1.20)   | 4.84 (0.79)   | 2.82 (0.60)**  | 2.23 (0.19)**  |
| Small intestine      | 2.49 (0.31)   | 4.05 (0.65)** | 3.37 (0.45)**  | 2.27 (0.25)**  |
| Large intestine      | 1.10 (0.28)   | 4.11 (0.38)   | 3.01 (0.40)**  | 2.36 (0.24)**  |
| Spleen               | 5.09 (0.25)*  | 9.26 (1.29)   | 7.17 (2.11)*   | 6.41 (3.29)*   |
| Pancreas             | 1.07 (0.19)*  | 1.99 (0.25)   | 1.97 (0.54)*   | 1.42 (0.24)*   |
| Lung                 | 20.31 (4.08)* | 7.65 (1.21)   | 3.95 (0.69)**  | 3.17 (0.25)**  |
| Heart                | 6.84 (1.01)   | 4.85 (0.47)   | 2.91 (0.42)*   | 2.36 (0.38)*   |
| Stomach <sup>†</sup> | 1.62 (0.11)** | 0.70 (0.08)   | 0.50 (0.10)**  | 0.51 (0.03)**  |
| Bone                 | 4.03 (0.43)   | 3.68 (0.16)   | 2.63 (0.54)**  | 2.23 (0.28)**  |
| Muscle               | 0.84 (0.22)** | 1.30 (0.32)   | 0.70 (0.27)*   | 0.94 (0.29)*   |
| Brain                | 0.86 (0.16)   | 0.34 (0.06)   | 0.19 (0.06)    | 0.13 (0.02)    |
| Colon 26             | 2.81 (0.64)** | 10.94 (2.16)* | 8.70 (1.16)**  | 7.86 (0.47)**  |
| Tumor/blood          | 0.07 (0.02)   | 1.13 (0.16)   | 2.57 (0.41)**  | 4.04 (0.70)**  |
| Tumor/muscle         | 3.52 (1.21)   | 9.80 (0.50)   | 11.18 (1.10)*  | 9.06 (3.20)    |

Data are expressed as % injected dose per gram of tissue. Each value represents mean (SD) for four mice. Significance was determined using an unpaired Student's t-test (\* $p < 0.05$ , \*\* $p < 0.01$  vs. the corresponding data of [<sup>125</sup>I]**3**). <sup>†</sup> Data are expressed as % injected dose.

## 6. Photodynamic therapy (PDT)

### 6.1 Detailed PDT data

**Table S2.** Relative tumor volume ( $V/V_0$ ) of control groups, I-TPP<sub>OH</sub> (**3**) and I-L-tyrosine-TPP (**9**) treated mice, with and without light irradiation in Colon 26 tumor bearing mice, monitored up to 7 days

| Days post injection | Relative tumor volume ( $V/V_0$ ) |              |                                        |                            |                                        |                          |
|---------------------|-----------------------------------|--------------|----------------------------------------|----------------------------|----------------------------------------|--------------------------|
|                     | Control                           |              | <b>3</b>                               |                            | <b>9</b>                               |                          |
|                     | Light                             | Dark         | Light                                  | Dark                       | Light                                  | Dark                     |
| 1                   | 1.73 (0.74)                       | 1.86 (0.76)  | 1.66 (0.36)                            | 1.53 (0.40)                | 1.66 (0.40)                            | 1.61 (0.25) <sup>#</sup> |
| 2                   | 2.12 (0.73)                       | 2.97 (0.59)  | 0.98 (0.36) <sup>***, ###, †</sup>     | 1.53 (0.24) <sup>###</sup> | 0.90 (0.24) <sup>***, ###, †††</sup>   | 1.99 (0.42)              |
| 3                   | 3.18 (1.34)                       | 4.19 (1.76)  | 0.90 (0.53) <sup>***, ###, †</sup>     | 2.28 (0.31) <sup>#</sup>   | 0.88 (0.38) <sup>***, ###, †</sup>     | 2.51 (0.67) <sup>#</sup> |
| 4                   | 4.80 (1.82)                       | 6.17 (1.98)  | 1.03 (0.55) <sup>***, ###, †, ††</sup> | 3.07 (0.55) <sup>###</sup> | 0.76 (0.24) <sup>***, ###, †, ††</sup> | 3.13 (0.83) <sup>#</sup> |
| 5                   | 7.24 (3.48)                       | 8.53 (2.42)  | 1.01 (0.62) <sup>***, ###, †</sup>     | 4.20 (0.89) <sup>##</sup>  | 1.17 (0.27) <sup>***, ###, †</sup>     | 4.01 (1.21) <sup>#</sup> |
| 6                   | 9.07 (4.34)                       | 10.81 (4.59) | 1.05 (0.85) <sup>***, ###, †</sup>     | 5.37 (1.23) <sup>#</sup>   | 1.15 (0.43) <sup>***, ###</sup>        | 4.83 (1.36) <sup>#</sup> |
| 7                   | 10.76 (3.72)                      | 12.93(5.11)  | 1.43 (1.24) <sup>***, ###, †, ††</sup> | 6.67 (2.33) <sup>#</sup>   | 1.34 (0.66) <sup>***, ###, †</sup>     | 6.25 (2.07)              |

Data were presented as relative values of tumor volume ( $V/V_0$ ) where  $V_0$  corresponds to the tumor volume on day 0. Each value represents mean (SD) for seven or eight mice. Significance was determined using one way analysis of variance (ANOVA) with Tukey's post hoc test (<sup>\*\*\*</sup> $p < 0.001$  vs. Control (Light), <sup>#</sup> $p < 0.05$ , <sup>##</sup> $p < 0.01$ , <sup>###</sup> $p < 0.001$  vs Control (Dark), <sup>†</sup> $p < 0.05$ , <sup>††</sup> $p < 0.01$ , vs. **3** (Dark), <sup>†</sup> $p < 0.05$ , <sup>††</sup> $p < 0.01$ , <sup>†††</sup> $p < 0.001$  vs. **9** (Dark)).

## 6.2 Tumor weight

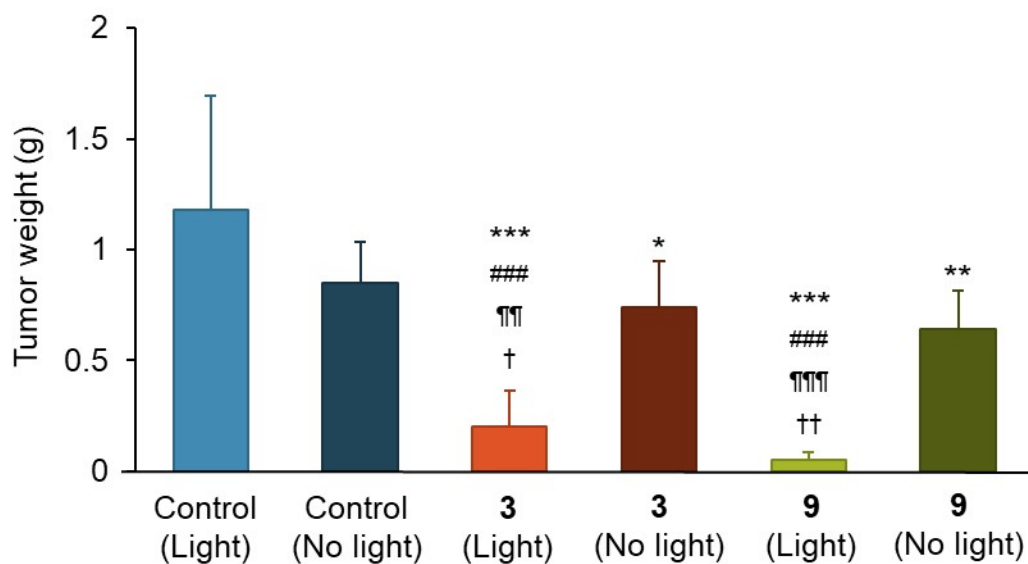

**Figure S3.** Tumor weight (g) on day 8 postinjection for control mice, I-TPP<sub>OH</sub> (**3**) treated mice, and I-L-tyrosine-TPP (**9**) treated mice with or without light irradiation. Each value represents mean (SD) for seven or eight mice. Significance was determined using one way analysis of variance (ANOVA) with Tukey's post hoc test ( $*p < 0.05$ ,  $**p < 0.01$ ,  $***p < 0.001$  vs. Control (Light),  $###p < 0.001$  vs Control (No light),  $†††p < 0.01$ ,  $††††p < 0.001$ , vs. **3** (No light),  $†p < 0.05$ ,  $††p < 0.01$  vs. **9** (No light)).

### 6.3 Body weight

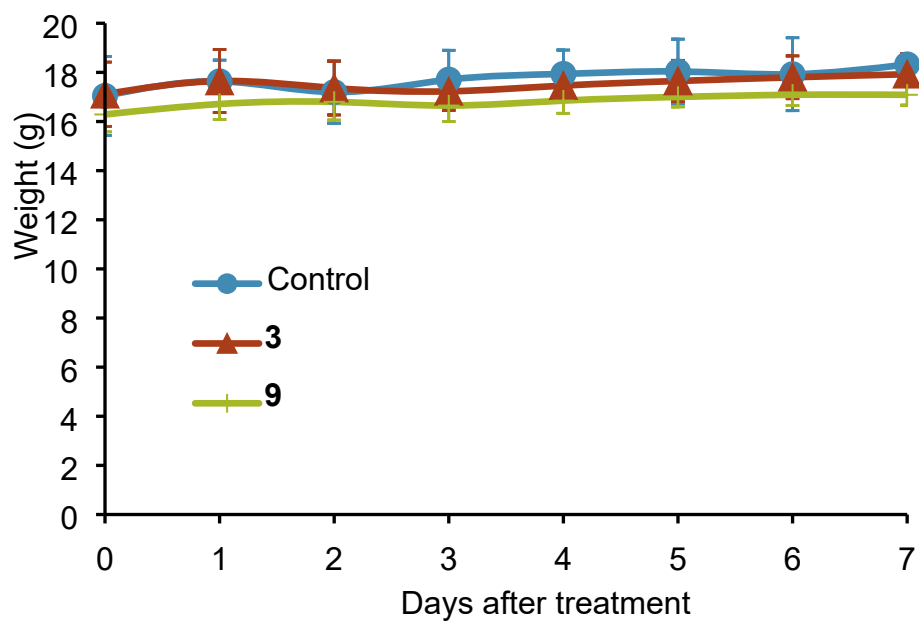

**Figure S4.** Body weight changes of control mice, I-TPP<sub>OH</sub> (**3**) treated mice, and I-L-tyrosine-TPP (**9**) treated mice. Each value represents mean (SD) for seven or eight mice.
